Incontestably, these are perceptive discussions of the moral quandaries evoked by population control, sterilization, drug abuse, genetic manipulation, euthanasia, and sports, and they surely deserve every anesthesiologist's attention. To those who enjoy being jolted out of their set views, this collection of disparate yet remarkably challenging essays will bring new understanding of troubled patients and also new understanding of the people who write about them. In no little measure these are 17 involuntary self-revelations, and it was indeed a pleasure to listen to them by the fireside.

B. RAYMOND FINK, M.D.  
Department of Anesthesiology  
University of Washington  
Seattle, WA 98195

**Electronic Analog Measurements and Transducers (Module 1, Module 2).** BY H. V. MALMSTADT, C. G. ENKE, AND S. R. CROUCH. Menlo Park, CA, W. A. Benjamin, Inc., 1973. Pages: Module 1, 203; Module 2, 355. Price: \$3.95 ea.

These books are part of a series of four intended to fit into a university-level course in electronics. They present clearly and systematically basic information on electronics and instrumentation systems, as well as problems for the student to solve. The problems can be run on laboratory equipment, but also offered is an elaborate Health/Malmstadt-Enke laboratory station.

The present two texts review succinctly, with good documentation and with excellent illustrations, the basic laws of physics concerning electricity and electromagnetic theory. The basic building blocks are accompanied by problems for

the reader so that he may evaluate his progress and understanding as he works through these volumes.

**Electronic Analog Measurements and Transducers (Module 1)** develops the background for basic electrical and electromagnetic theory, and introduces the reader to ways of transducing physical quantities and manipulating electrical signals so that measurements may be carried out.

**Control of Electrical Quantities in Instrumentation (Module 2)** instructs the reader in the area of instrumentation, starting with simple resistive devices for measurement and control which include resistors, resistive transducers, measurement of resistance, and measurement of network analysis. It then goes into capacitive and inductive control devices which include the integration, differentiation and logarithmic converters. The text is up-to-date in that it goes into some of the now accepted built-in features in monitoring equipment such as electronic switching, solid-state switching and logic elements. In the appendix details on the fabrication of solid-state devices such as transistors are described.

Those interested in research who have a thorough working knowledge of these two volumes will be in a position to interpret manuals published by various companies manufacturing solid-state components and will be able to attempt to design some of their own laboratory equipment to meet data-reduction needs. They would also be in a position to understand many types of electronic laboratory equipment and appreciate the many possible sources of errors.

J. WELDON BELLVILLE, M.D.  
Department of Anesthesiology  
UCLA Medical Center  
Los Angeles, CA 90024

## Books Received

**Planning of Surgical Centres.** Second edition. BY ERVIN PUTSEP. London, Lloyd-Luke (Medical Books) Ltd., 1973. Pp. 250, illus. \$21.95.

**Best & Taylor's Physiological Basis of Medical Practice.** Ninth edition. EDITED BY JOHN R. BROBECK. Baltimore, Williams and Wilkins, 1973. Pp. 1409, illus. \$22.00.

**Medical Examination Review Book. Vol. 12.** Fourth edition. BY ROBERT C. BROWN. Flushing, N.Y., Medical Examination Publishing Co., Inc., 1973. Pp. 214. \$7.50.

**Acupuncture: An International Bibliography.** BY BILLY K. S. TAM AND MIRIAM S. L. TAM. Metuchen, N.J., 1973. Pp. 137. \$5.00.

**The Brompton Hospital Guide To Chest Physiotherapy.** Second edition. BY D. V. GASKELL AND B. A. WEBBER. Philadelphia, F. A. Davis, 1973. Pp. 80. \$5.25.

**Illustrated Preoperative and Postoperative Care.** Second edition. BY PHILIP THOREK. Philadelphia, J. B. Lippincott, 1973. Pp. 147. \$8.75.

**Anesthesia and Uncommon Diseases.** BY J. KATZ AND L. B. KADIS. Philadelphia, W. B. Saunders, 1973. Pp. 543. \$21.00.

**Anesthesiology Progress since 1940.** BY E. M. PAPPER, S. H. NGAI, AND L. C. MARK. Coral Gables, FL, University of Miami Press, 1973. Pp. 192. \$7.95.

**Introduction to Acupuncture Anesthesia.** BY W. C. LOWE. Flushing, NY, Medical Examination Publishing Co., Inc., 1973. Pp. 101. \$5.00.

**Butyrophenones in Psychiatry** BY A. DiMASCIO AND R. I. SHADER. New York, Raven Press, 1972. Pp. 128. \$9.75.

**Antiepileptic Drugs.** BY D. M. WOODBURY, J. K. PENRY, AND R. P. SCHMIDT. New York, Raven Press, 1972. Pp. 536. \$19.75.

**The Benzodiazepines.** BY S. GARATTINI, E. MUSINI AND L. O. RANDALL. New York, Raven Press, 1973. Pp. 685. \$35.00.

**Marihuana—Deceptive Weed.** BY G. G. NAHAS. New York, Raven Press, 1973. Pp. 334. \$12.50.
